# Supplementary material for: Microfluidic toolbox using padlock probes and rolling circle amplification for direct detection and genotyping of viral RNA
Source: RSC Adv. 2026 Apr 10;16(21):19119–27. doi: 10.1039/d6ra00912c (PMC13068080; doi:10.1039/d6ra00912c)
Supplement: RA-016-D6RA00912C-s003 [file RA-016-D6RA00912C-s003.xlsx]

## Sheet: Wu
	Cy3				Cy5				AF488
Concentration	Individual Count	Count Sum	Average Count	Desv.Pad	Individual Count	Count Sum	Average Count	Desv.Pad	Individual Count	Count Sum	Average Count	Desv.Pad
10000	168	861	677	159.399	12	40	33	10.4403	16	27	36	10.1489
	177				11				2
	259				6				7
	257				11				2
	175	589			13	38			6	47
	133				6				14
	133				11				15
	148				8				12
	130	581			9	21			2	34
	128				2				15
	128				6				8
	195				4				9
1000	53	164	147	22.1133	6	23	19.6667	3.51188	8	41	34	8.88819
	4				4				17
	61				11				13
	46				2				3
	72	122			5	16			10	24
	16				4				2
	26				5				6
	8				2				6
	13	155			2	20			8	37
	11				6				6
	57				5				6
	74				7				17
300	16	68	65.6667	32.5628	5	19	22.6667	3.21455	7	25	37.6667	11.3725
	20				6				3
	25				8				14
	7				0				1
	28	97			1	25			3	41
	44				13				6
	21				2				7
	4				9				25
	8	32			0	24			18	47
	5				9				14
	11				10				12
	8				5				3
100	7	40	59	20.0749	3	22	20.3333	1.52753	3	21	24	3
	7				2				4
	17				12				10
	9				5				4
	21	80			12	20			6	27
	43				5				9
	10				1				4
	6				2				8
	7	57			6	19			9	24
	18				9				5
	22				3				7
	10				1				3
10	11	33	40.6667	7.50555	2	16	18	6.245	3	15	23.3333	8.5049
	6				10				2
	11				3				8
	5				1				2
	6	41			0	13			8	32
	8				0				2
	14				7				10
	13				6				12
	6	48			3	25			5	23
	18				6				2
	12				11				12
	12				5				4
0	6	19	17.3333	2.08167	12	14	12.3333	5.68624	2	8	14	6.55744		1	1000000	LoD Cy3	23.5783	23.5783
	3				0				0					1	1000000	LoD Cy5	29.3921	29.3921
	6				2				5					1	1000000	LoD AF488	33.6723	33.6723
	4				0				1
	2	18			1	17			5	21				1	1000000	LoD Average	28.8809	28.8809
	6				11				6
	5				3				4
	5				2				6
	2	15			0	6			3	13
	1				2				1
	4				2				3
	8				2				6

## Sheet: Alfa
	Cy3				Cy5				AF488
Concentration	Individual Count	Count Sum	Average Count	Desv.Pad	Individual Count	Count Sum	Average Count	Desv.Pad	Individual Count	Count Sum	Average Count	Desv.Pad
10000	4	11	20.6667	9.07377	117	469	516.667	121.714	5	16	23.6667	6.65833
	3				114				4
	1				116				5
	3				122				2
	6	22			117	655			5	28
	3				208				7
	6				121				9
	7				209				7
	5	29			107	426			6	27
	8				108				2
	10				106				15
	6				105				4
1000	1	11	19	7	33	105	172	60.3241	5	20	17	2.64575
	5				9				9
	2				21				5
	3				42				1
	10	24			115	222			9	16
	7				10				2
	5				91				4
	2				6				1
	13	22			114	189			2	15
	3				13				1
	1				11				2
	5				51				10
300	9	16	19	5.19615	2	130	156.333	25.1064	7	20	18	3.4641
	4				70				6
	1				3				4
	2				55				3
	8	25			39	159			2	14
	5				82				1
	10				21				7
	2				17				4
	1	16			50	180			2	20
	4				45				8
	9				50				7
	2				35				3
100	2	16	20.6667	4.16333	10	27	38	11.5326	1	20	21.3333	4.16333
	1				4				8
	9				9				8
	4				4				3
	6	22			4	37			4	18
	1				23				7
	7				7				5
	8				3				2
	8	24			10	50			10	26
	5				13				8
	7				22				6
	4				5				2
10	5	13	18	4.3589	8	23	27.3333	4.04145	7	16	15	1.73205
	1				3				1
	6				5				2
	1				7				6
	3	21			8	28			2	13
	6				8				1
	4				9				4
	8				3				6
	1	20			10	31			7	16
	2				1				1
	3				1				3
	14				19				5
0	3	21	19.3333	2.08167	2	5	9.66667	5.68624	5	20	16.3333	5.50757		1	1000000	LoD Cy3	25.5783	25.5783
	7				2				3					1	1000000	LoD Cy5	26.7254	26.7254
	6				1				6					1	1000000	LoD AF488	32.856	32.856
	5				0				6
	8	20			3	8			5	19				1	1000000	LoD Average	28.3866	28.3866
	6				1				4
	2				2				5
	4				2				5
	2	17			4	16			3	10
	6				3				1
	8				8				1
	1				1				5

## Sheet: Beta
	Cy3				Cy5				AF488
Concentration	Individual Count	Count Sum	Average Count	Desv.Pad	Individual Count	Count Sum	Average Count	Desv.Pad	Individual Count	Count Sum	Average Count	Desv.Pad
10000	17	38	31.3333	8.32666	5	24	31.6667	6.65833	208	890	745.667	139.307
	7				11				219
	6				7				218
	8				1				245
	3	34			5	36			225	735
	12				2				137
	6				14				258
	13				15				115
	7	22			7	35			141	612
	6				6				169
	5				13				193
	4				9				109
1000	3	19	17.3333	3.78594	4	18	21.6667	7.23418	26	77	152	78.7337
	2				1				19
	1				9				26
	13				4				6
	8	20			9	30			3	145
	1				2				48
	7				12				52
	4				7				42
	2	13			4	17			55	234
	3				9				50
	2				3				99
	6				1				30
300	4	17	17.6667	2.08167	8	29	19	8.7178	17	84	137	66.053
	2				5				20
	9				15				27
	2				1				20
	3	16			1	15			21	116
	8				8				44
	4				5				32
	1				1				19
	5	20			5	13			20	211
	8				2				37
	4				4				19
	3				2				135
100	3	22	21.3333	2.08167	6	16	22	5.56776	24	85	77	21.166
	3				3				21
	4				1				25
	12				6				15
	3	19			1	23			11	53
	5				5				12
	8				2				15
	3				15				15
	8	23			4	27			25	93
	6				11				28
	2				5				32
	7				7				8
10	12	21	24	6.08276	2	22	21	1	7	38	40.3333	14.6401
	2				9				12
	5				10				17
	2				1				2
	2	20			1	21			21	56
	7				3				4
	7				2				12
	4				15				19
	7	31			7	20			2	27
	5				6				3
	7				4				9
	12				3				13
0	4	17	14.3333	3.05505	5	12	10.3333	3.78594	5	18	18.6667	2.08167		1	1000000	LoD Cy3	23.4985	23.4985
	4				2				4					1	1000000	LoD Cy5	21.6912	21.6912
	8				5				7					1	1000000	LoD AF488	24.9117	24.9117
	1				0				2
	0	11			2	6			5	17				1	1000000	LoD Average	23.3671	23.3671
	7				1				3
	3				1				1
	1				2				8
	2	15			1	13			7	21
	3				8				5
	9				3				4
	1				1				5
