# Supplementary material for: Microfluidic toolbox using padlock probes and rolling circle amplification for direct detection and genotyping of viral RNA
Source: RSC Adv. 2026 Apr 10;16(21):19119–27. doi: 10.1039/d6ra00912c (PMC13068080; doi:10.1039/d6ra00912c)
Supplement: RA-016-D6RA00912C-s004 [file RA-016-D6RA00912C-s004.xlsx]

## Sheet: Wu
	Cy3					Cy5					AF488
Concentration	Beads Signal	Background Signal	Fluorescent Signal (a.u.)	Average Signal	Desv.Pad	Beads Signal	Background Signal	Fluorescent Signal (a.u.)	Average Signal	Desv.Pad	Beads Signal	Background Signal	Fluorescent Signal (a.u.)	Average Signal	Desv.Pad
10000	21422.3	271.346	21150.9	17148.2	3635.07	358.469	150.421	208.048	151.01	50.1152	392.444	212.868	179.576	148.446	28.6812
	14318.6	266.03	14052.5			263.856	149.823	114.033			377.786	235.117	142.669
	16507.1	265.88	16241.2			330.399	199.45	130.949			367.757	244.664	123.093
1000	4231.61	344.544	3887.07	2417.58	1276.95	236.162	206.806	29.356	45.412	23.5769	227.885	214.232	13.653	10.5837	3.33494
	2136.07	348.007	1788.07			243.444	209.044	34.4			220.915	213.88	7.035
	1929.2	351.584	1577.62			279.337	206.857	72.48			221.161	210.098	11.063
300	2778.58	374.643	2403.93	1701.09	608.73	229.311	209.594	19.717	26.253	7.46311	231.982	219.959	12.023	15.3123	2.90107
	1729.44	372.001	1357.43			234.554	209.897	24.657			236.499	220.091	16.408
	1708.71	366.81	1341.9			240.797	206.412	34.385			231.835	214.329	17.506
100	1509.95	299.02	1210.93	983.445	218.989	256.72	211.256	45.464	32.341	11.751	237.962	214.984	22.978	16.4287	5.75356
	1072.04	297.964	774.077			233.924	211.132	22.792			231.081	216.961	14.12
	1259.95	294.623	965.327			234.871	206.104	28.767			227.767	215.579	12.188
10	494.708	319.481	175.227	145.563	60.476	251.314	211.243	40.071	45.6377	12.82	237.532	223.852	13.68	17.462	3.32574
	391.821	315.838	75.983			273.347	213.047	60.3			241.215	221.285	19.93
	490.719	305.239	185.48			246.682	210.14	36.542			234.491	215.715	18.776
0	281.114	241.287	39.827	35.0863	5.11448	241.153	230.832	10.321	12.0127	2.79434	250.249	235.062	15.187	10.8797	8.5182
	277.104	247.438	29.666			246.027	235.548	10.479			256.338	255.27	1.068
	282.589	246.823	35.766			254.07	238.832	15.238			279.07	262.686	16.384
										1	1000000	LoD Cy3	50.4298	50.4298
										1	1000000	LoD Cy5	20.3957	20.3957
										1	1000000	LoD AF488	36.4343	36.4343
										1	1000000	LoD Average	35.7532	35.7532

## Sheet: Alfa
	Cy3					Cy5					AF488
Concentration	Beads Signal	Background Signal	Fluorescent Signal (a.u.)	Average Signal	Desv.Pad	Beads Signal	Background Signal	Fluorescent Signal (a.u.)	Average Signal	Desv.Pad	Beads Signal	Background Signal	Fluorescent Signal (a.u.)	Average Signal	Desv.Pad
10000	262.444	212.868	49.576	33.0507	14.4674	21245.7	561.432	20684.2	18024.8	3533.3	245.277	205.282	39.995	50.6453	17.4477
	257.786	235.117	22.669			19668.9	294.276	19374.6			246.873	205.713	41.16
	264.664	237.757	26.907			14446.1	430.513	14015.6			276.531	205.75	70.781
1000	227.885	214.232	13.653	10.5837	3.33494	6981.53	404.577	6576.96	5743.6	2114.2	236.266	218.987	17.279	20.3383	4.92363
	220.915	213.88	7.035			7709.79	395.675	7314.12			233.318	215.6	17.718
	221.161	210.098	11.063			3745.1	405.385	3339.71			246.097	220.079	26.018
300	231.982	219.959	12.023	15.3123	2.90107	986.688	333.825	652.863	1351.12	637.526	245.336	225.279	20.057	19.8907	4.80266
	236.499	220.091	16.408			1828.59	330.257	1498.33			248.755	224.147	24.608
	231.835	214.329	17.506			2219.55	317.388	1902.16			239.593	224.586	15.007
100	237.962	214.984	22.978	16.4287	5.75356	1494.38	252.632	1241.75	930.97	274.081	242.298	222.658	19.64	16.5947	3.1356
	231.081	216.961	14.12			1083.6	256.242	827.361			238.383	225.007	13.376
	227.767	215.579	12.188			979.398	255.601	723.797			243.688	226.92	16.768
10	237.532	223.852	13.68	17.462	3.32574	377.185	251.455	125.73	131.95	49.8852	241.331	219.308	22.023	18.831	3.45348
	241.215	221.285	19.93			329.781	244.314	85.467			233.695	218.53	15.165
	234.491	215.715	18.776			435.164	250.51	184.654			232.764	213.459	19.305
0	250.249	235.062	15.187	10.8797	8.5182	369.53	337.796	31.734	31.7473	5.85901	226.178	224.037	2.141	4.53867	2.91053
	256.338	255.27	1.068			387.672	350.059	37.613			225.571	221.873	3.698
	279.07	262.686	16.384			339.883	313.988	25.895			224.872	217.095	7.777
										1	1000000	LoD Cy3	36.4343	36.4343
										1	1000000	LoD Cy5	49.3244	49.3244
										1	1000000	LoD AF488	13.2702	13.2702
										1	1000000	LoD Average	33.0096	33.0096

## Sheet: Beta
	Cy3					Cy5					AF488
Concentration	Beads Signal	Background Signal	Fluorescent Signal (a.u.)	Average Signal	Desv.Pad	Beads Signal	Background Signal	Fluorescent Signal (a.u.)	Average Signal	Desv.Pad	Beads Signal	Background Signal	Fluorescent Signal (a.u.)	Average Signal	Desv.Pad
10000	519.939	312.817	207.122	179.93	34.0515	458.614	238.042	220.572	160.553	53.9299	29917	241.444	29675.5	24132.3	5774.24
	400.315	258.577	141.738			336.167	220.002	116.165			18383	231.091	18151.9
	489.324	298.395	190.929			386.402	241.479	144.923			24866.8	297.153	24569.6
1000	433.268	272.27	160.998	163.707	33.864	322.884	220.84	102.044	149.616	57.8896	9098.32	303.321	8794.99	10223.1	2875.69
	425.069	293.79	131.279			456.926	242.856	214.07			13827.7	294.468	13533.3
	454.61	255.766	198.844			374.259	241.525	132.734			8624.51	283.538	8340.97
300	218.482	134.834	83.648	122.679	45.7171	345.729	142.604	203.125	131.108	62.3895	3858.59	278.507	3580.08	2423.19	1061.62
	261.409	149.995	111.414			279.969	186.485	93.484			2474.48	278.654	2195.82
	336.28	163.304	172.976			302.024	205.309	96.715			1789.58	295.908	1493.67
100	338.913	273.344	65.569	81.6943	43.8435	169.078	111.79	57.288	81.15	32.6585	1605.44	289.642	1315.8	1092.02	369.235
	341.23	293.033	48.197			357.453	289.661	67.792			979.98	314.141	665.839
	384.155	252.838	131.317			344.248	225.878	118.37			1577.4	282.989	1294.41
10	303.918	260.106	43.812	55.966	43.9811	327.643	284.103	43.54	32.1043	10.7327	473.624	270.382	203.242	247.182	71.5259
	259.551	240.211	19.34			312.969	282.446	30.523			465.353	256.765	208.588
	406.446	301.7	104.746			301.718	279.468	22.25			594.904	265.189	329.715
0	288.52	244.151	44.369	39.376	4.96131	257.141	238.264	18.877	20.783	7.24553	217.709	156.647	61.062	62.6143	2.1466
	297.999	263.552	34.447			288.45	259.659	28.791			217.897	156.18	61.717
	306.483	267.171	39.312			271.277	256.596	14.681			211.266	146.202	65.064
										1	1000000	LoD Cy3	54.2599	54.2599
										1	1000000	LoD Cy5	42.5196	42.5196
										1	1000000	LoD AF488	69.0541	69.0541
										1	1000000	LoD Average	55.2779	55.2779
